# Supplementary material for: Theoretical analysis of 17–19-atom metal clusters using many-body potentials †
Source: Royal Society of Chemistry journal article supplement (doi:10.1039/a908003a), 2000-01-01

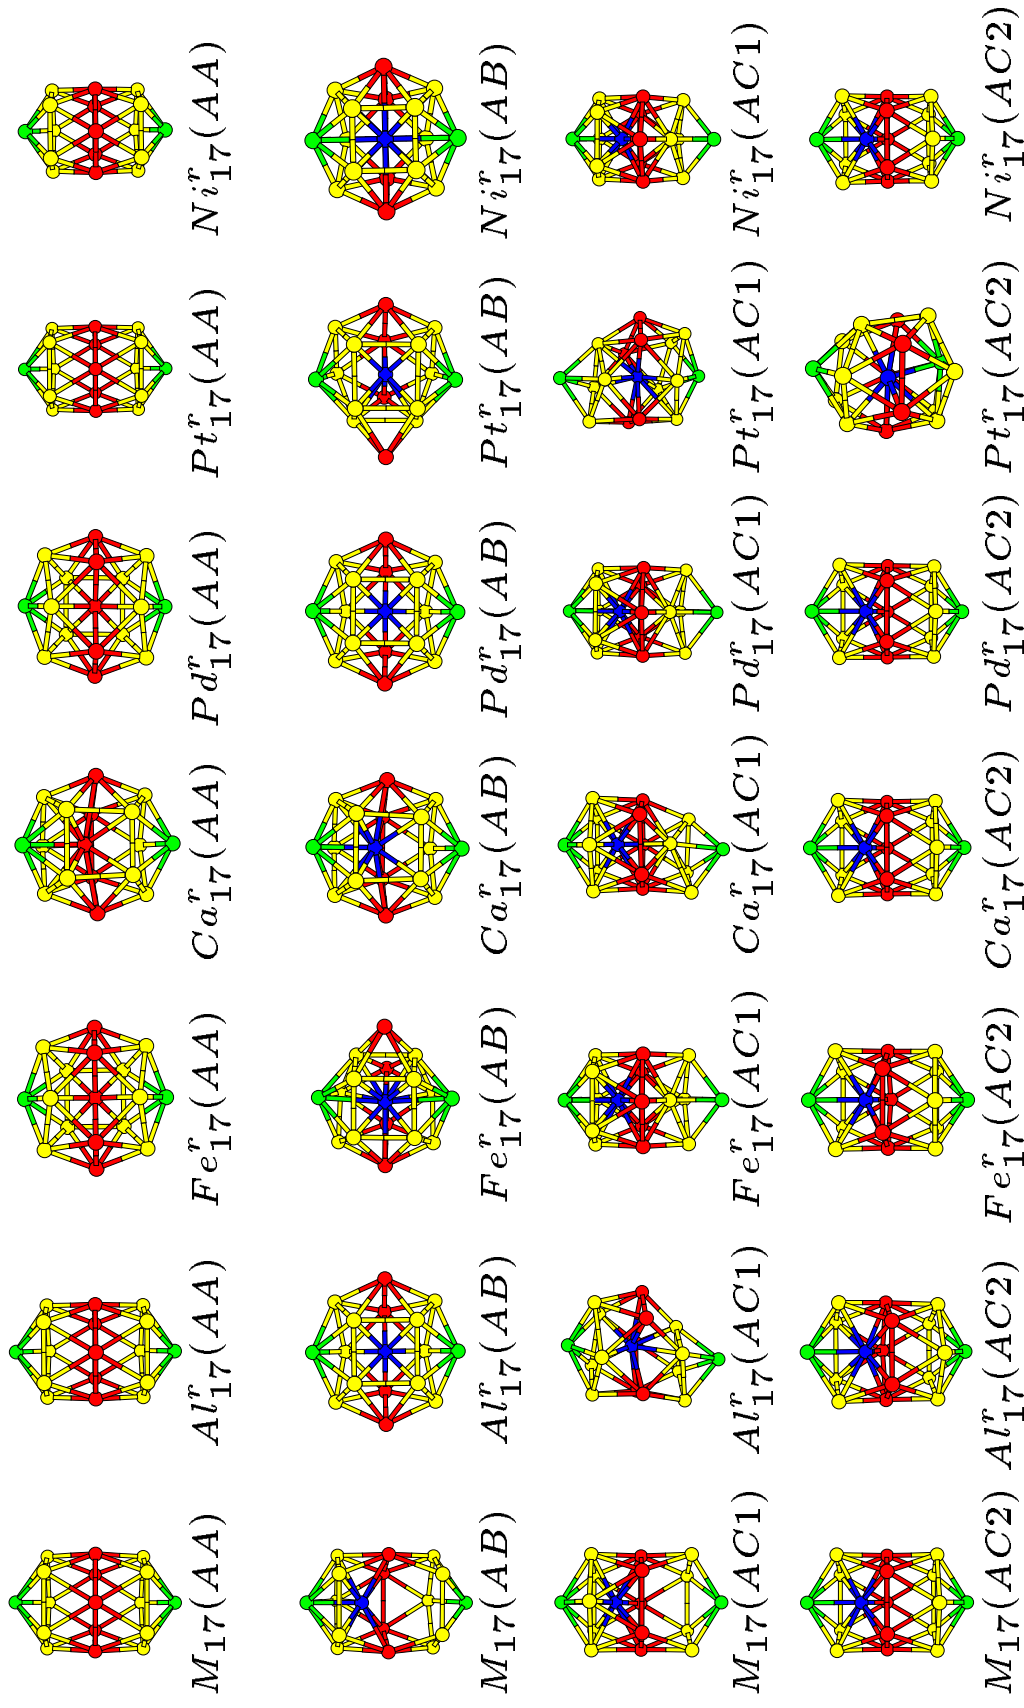

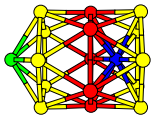

$M_{17}(AD1)$   $Al_{17}^r(AD1)$   $Fe_{17}^r(AD1)$   $Ca_{17}^r(AD1)$   $Pd_{17}^r(AD1)$   $Pt_{17}^r(AD1)$   $Ni_{17}^r(AD1)$

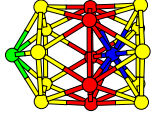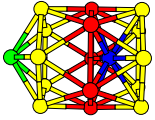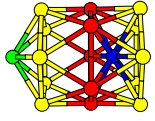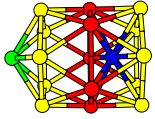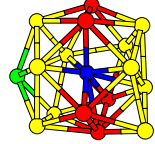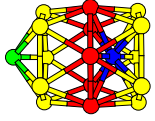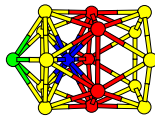

$M_{17}(AD2)$   $Al_{17}^r(AD2)$   $Fe_{17}^r(AD2)$   $Ca_{17}^r(AD2)$   $Pd_{17}^r(AD2)$   $Pt_{17}^r(AD2)$   $Ni_{17}^r(AD2)$

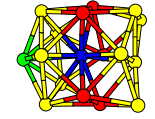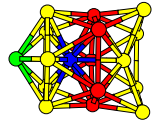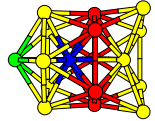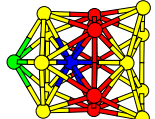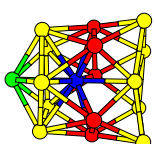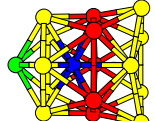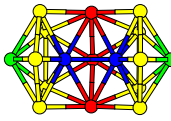

$M_{17}(BB1)$   $Al_{17}^r(BB1)$   $Fe_{17}^r(BB1)$   $Ca_{17}^r(BB1)$   $Pd_{17}^r(BB1)$   $Pt_{17}^r(BB1)$   $Ni_{17}^r(BB1)$

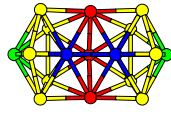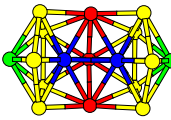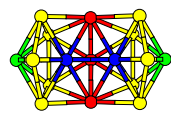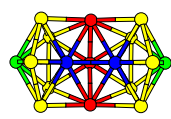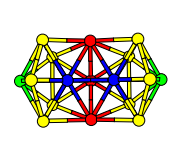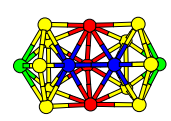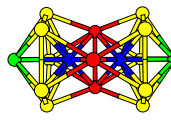

$M_{17}(BB2)$   $Al_{17}^r(BB2)$   $Fe_{17}^r(BB2)$   $Ca_{17}^r(BB2)$   $Pd_{17}^r(BB2)$   $Pt_{17}^r(BB2)$   $Ni_{17}^r(BB2)$

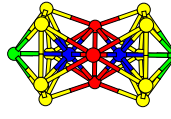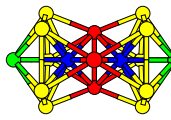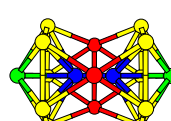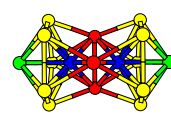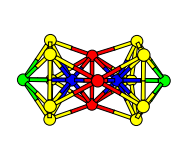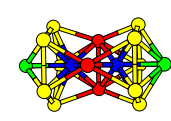

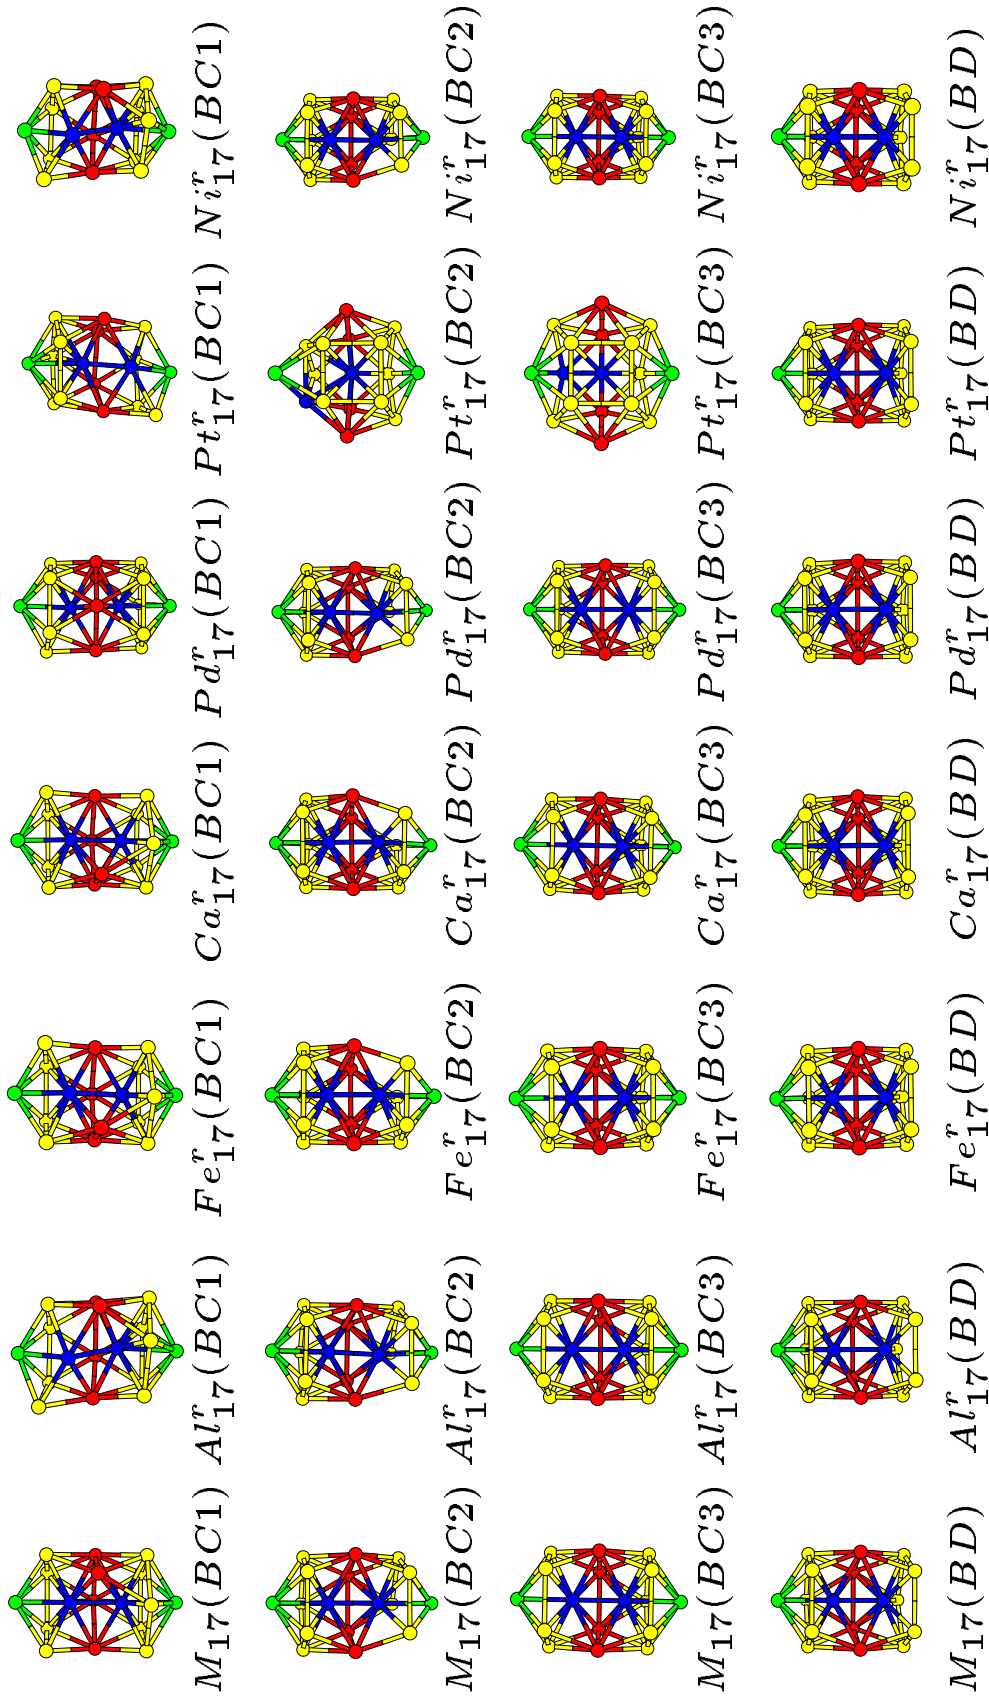

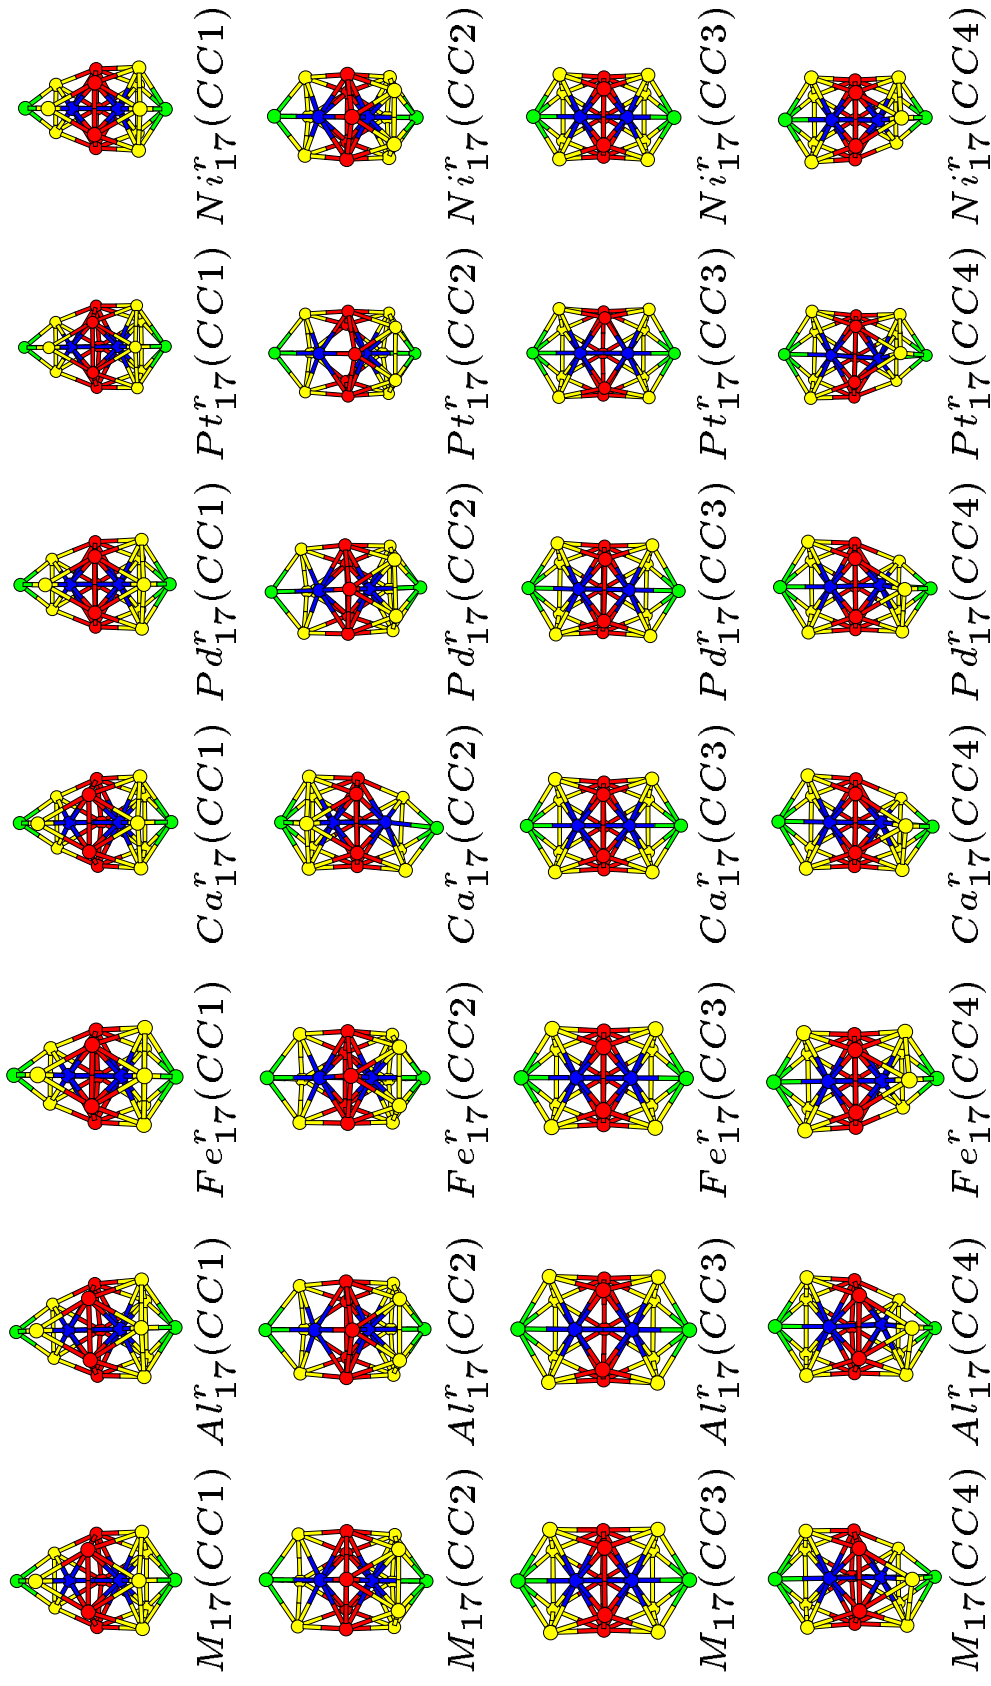

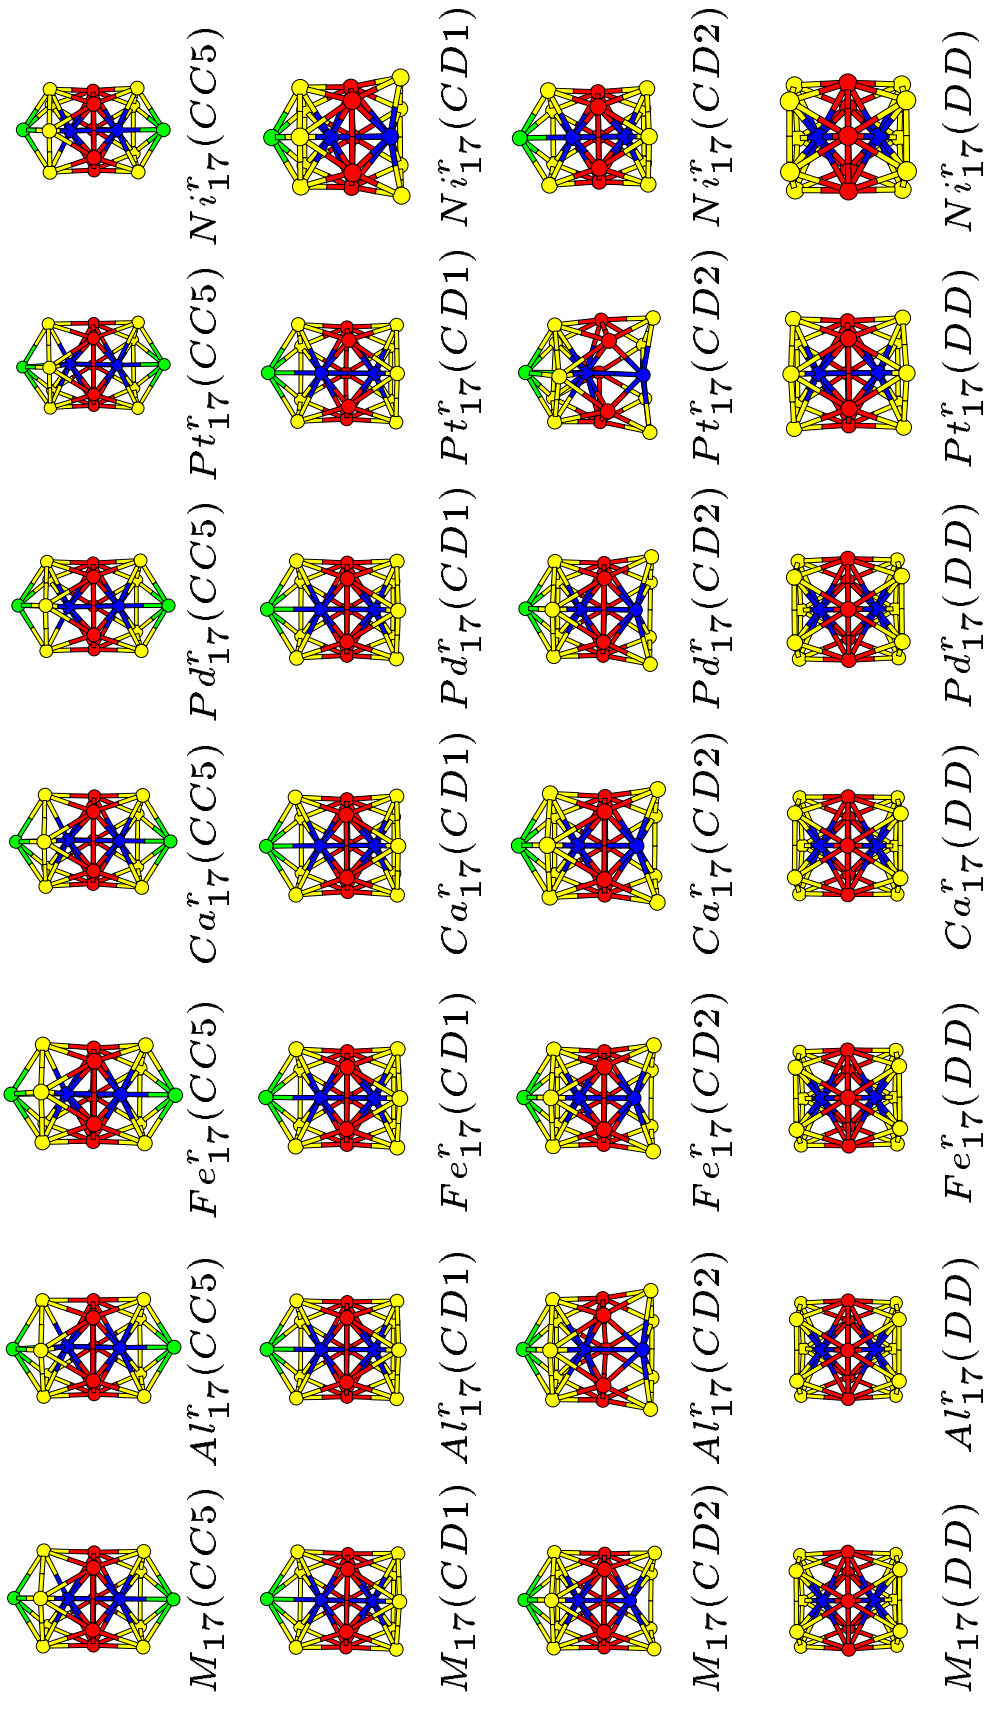

Supplement: a908003a.pdf [file a908003a.pdf]
